# Supplementary material for: Effect of postoperative 660-nm low-level laser therapy on the radiographic crestal bone loss of fresh-socket dental implants
Source: PubMed Central journal article supplement (PMC11459084; doi:10.34172/joddd.29923), 2024-09-07
Supplement: joddd-18-210-s001.pdf [file joddd-18-210-s001.pdf]

**Supplementary file 1.** The treated site and implant data for the studied patients

| Subject no. | Implant Length (mm) | Implant Diameter (mm) | Implant Location | Gender | Laser Therapy |
|-------------|---------------------|-----------------------|------------------|--------|---------------|
| S1          | 10                  | 4                     | 24               | Male   | Yes           |
| S2          | 10                  | 4                     | 15               | Male   | Yes           |
| S3          | 11.5                | 4                     | 11               | Female | Yes           |
| S4          | 10                  | 4.5                   | 22               | Male   | Yes           |
| S5          | 11.5                | 4                     | 12               | Male   | Yes           |
| S6          | 11.5                | 4                     | 34               | Female | Yes           |
| S7          | 10                  | 4.5                   | 46               | Male   | Yes           |
| S8          | 10                  | 4.5                   | 21               | Female | Yes           |
| S9          | 10                  | 4                     | 12               | Male   | Yes           |
| S10         | 10                  | 4.5                   | 22               | Female | Yes           |
| S11         | 10                  | 4                     | 25               | Male   | Yes           |
| S12         | 11.5                | 4.5                   | 16               | Male   | Yes           |
| S13         | 11.5                | 4                     | 36               | Male   | Yes           |
| S14         | 10                  | 4                     | 45               | Female | Yes           |
| S15         | 10                  | 4                     | 47               | Female | Yes           |
| S16         | 10                  | 4                     | 26               | Male   | No            |
| S17         | 11.5                | 4.5                   | 25               | Male   | No            |
| S18         | 10                  | 4.5                   | 15               | Female | No            |
| S19         | 11.5                | 4                     | 14               | Male   | No            |
| S20         | 10                  | 4.5                   | 16               | Female | No            |
| S21         | 10                  | 4                     | 36               | Male   | No            |
| S22         | 10                  | 4.5                   | 34               | Male   | No            |
| S23         | 10                  | 4.5                   | 44               | Male   | No            |
| S24         | 11.5                | 4.5                   | 22               | Male   | No            |
| S25         | 11.5                | 4                     | 11               | Female | No            |
| S26         | 10                  | 4                     | 26               | Male   | No            |
| S27         | 10                  | 4                     | 45               | Female | No            |
| S28         | 10                  | 4.5                   | 36               | Male   | No            |
| S29         | 10                  | 4                     | 23               | Male   | No            |
| S30         | 11.5                | 4                     | 16               | Male   | No            |
