# Supplementary material for: Effect of postoperative 660-nm low-level laser therapy on the radiographic crestal bone loss of fresh-socket dental implants
Source: PubMed Central journal article supplement (PMC11459084; doi:10.34172/joddd.29923), 2024-09-07
Supplement: joddd-18-210-s002.pdf [file joddd-18-210-s002.pdf]

**Supplementary file 2. Bone level and bone loss data for the studied patients**

| Subject no. | Bone level from reference line (top surface of the implant) (average values) (mm) |        |         |        | Bone loss |        | Laser Therapy |
|-------------|-----------------------------------------------------------------------------------|--------|---------|--------|-----------|--------|---------------|
|             | 0 month                                                                           |        | 4 month |        |           |        |               |
|             | Mesial                                                                            | Distal | Mesial  | Distal | Mesial    | Distal |               |
| S1          | 3.43                                                                              | 2.98   | 2.86    | 2.37   | 0.57      | 0.61   | Yes           |
| S2          | 1.83                                                                              | 1.77   | 1.02    | 1.14   | 0.81      | 0.63   | Yes           |
| S3          | 2.22                                                                              | 2.60   | 1.73    | 2.22   | 0.49      | 0.38   | Yes           |
| S4          | 1.92                                                                              | 1.95   | 1.52    | 1.53   | 0.40      | 0.42   | Yes           |
| S5          | 1.70                                                                              | 1.98   | 1.40    | 1.37   | 0.30      | 0.61   | Yes           |
| S6          | 2.74                                                                              | 2.38   | 2.51    | 2.14   | 0.23      | 0.37   | Yes           |
| S7          | 3.12                                                                              | 3.75   | 2.62    | 2.60   | 0.50      | 1.15   | Yes           |
| S8          | 2.44                                                                              | 2.84   | 2.11    | 2.23   | 0.33      | 0.61   | Yes           |
| S9          | 3.86                                                                              | 3.54   | 3.42    | 3.08   | 0.44      | 0.46   | Yes           |
| S10         | 2.12                                                                              | 2.35   | 1.60    | 1.81   | 0.52      | 0.54   | Yes           |
| S11         | 3.18                                                                              | 3.30   | 2.42    | 2.38   | 0.76      | 0.92   | Yes           |
| S12         | 1.69                                                                              | 1.34   | 1.11    | 0.97   | 0.58      | 0.37   | Yes           |
| S13         | 2.78                                                                              | 2.69   | 2.06    | 2.16   | 0.72      | 0.53   | Yes           |
| S14         | 2.75                                                                              | 2.56   | 2.02    | 1.88   | 0.73      | 0.68   | Yes           |
| S15         | 1.54                                                                              | 1.63   | Fail    | Fail   | Fail      | Fail   | Yes           |
| S16         | 2.86                                                                              | 1.80   | 1.48    | 1.04   | 1.38      | 0.76   | No            |
| S17         | 1.80                                                                              | 1.69   | 0.74    | 0.85   | 1.06      | 0.84   | No            |
| S18         | 2.33                                                                              | 2.10   | 1.19    | 0.68   | 1.14      | 1.42   | No            |
| S19         | 3.46                                                                              | 3.12   | 1.36    | 1.43   | 1.90      | 1.69   | No            |
| S20         | 2.13                                                                              | 1.96   | 0.89    | 0.94   | 1.24      | 1.02   | No            |
| S21         | 3.87                                                                              | 3.56   | 2.23    | 2.45   | 1.64      | 1.11   | No            |
| S22         | 1.45                                                                              | 1.34   | 0.42    | 0.25   | 1.03      | 1.09   | No            |
| S23         | 2.11                                                                              | 2.20   | 1.28    | 1.42   | 0.83      | 0.78   | No            |
| S24         | 1.70                                                                              | 1.98   | 1.30    | 1.47   | 0.40      | 0.51   | No            |
| S25         | 2.14                                                                              | 2.31   | 1.28    | 1.28   | 0.86      | 1.03   | No            |
| S26         | 2.54                                                                              | 2.42   | 1.05    | 1.10   | 1.49      | 1.32   | No            |
| S27         | 1.90                                                                              | 1.79   | 0.78    | 0.91   | 1.12      | 0.88   | No            |
| S28         | 2.31                                                                              | 2.18   | 1.42    | 1.12   | 0.89      | 1.06   | No            |
| S29         | 1.31                                                                              | 1.24   | 0.33    | 0.45   | 0.98      | 0.79   | No            |
| S30         | 2.31                                                                              | 2.18   | Fail    | Fail   | Fail      | Fail   | No            |
